# Supplementary material
Source: PubMed Central journal article supplement (PMC3325694)
Supplement: 1119737109_pnas.1119737109_SI.pdf [file 1119737109_pnas.1119737109_SI.pdf]

# Supporting Information

Deegan 10.1073/pnas.1119737109

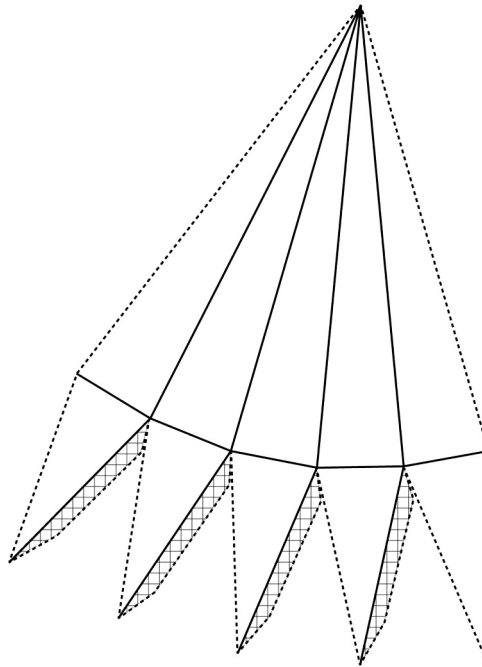

**Fig. S1.** Paper model for illustrating coupling between valves shown in Fig. S2. Cut along dotted line, crease solid lines, and glue hatched flaps to neighboring triangle.



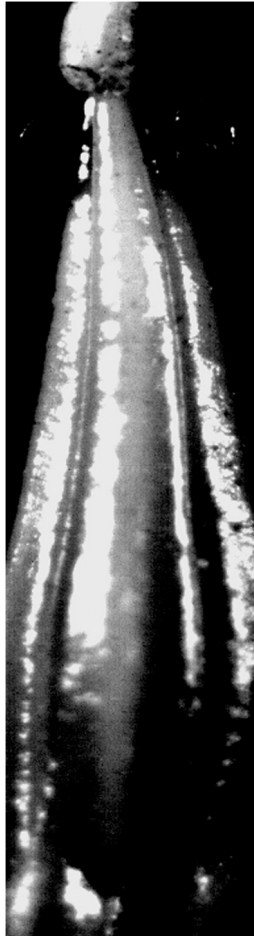

**Movie S2.** Creeping crack filmed at 3,100 frames-per second. The film shows a slow moving crack progating down the left seam. When it reaches about 50% of the seam length it initiates an explosive release of the seeds.

[Movie S2 \(AVI\)](#)

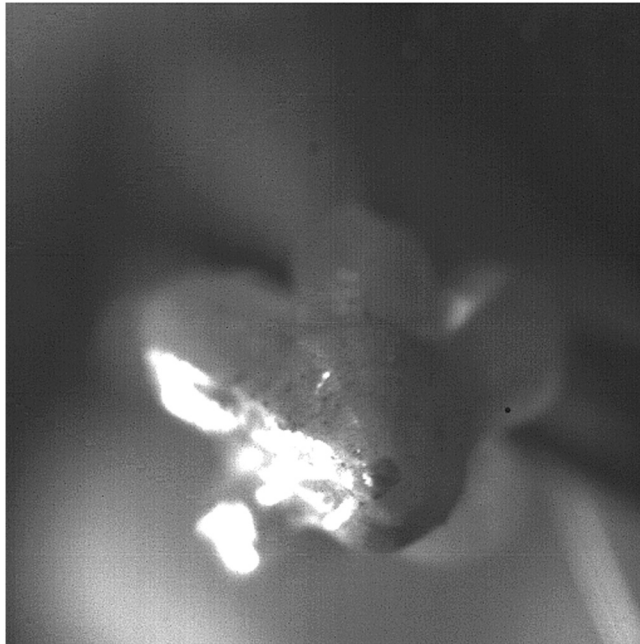

**Movie S3.** Exploding pod filmed from below at 3,800 frames-per second. Note that all the seams open within one frame (263 microseconds).

[Movie S3 \(WMV\)](#)
